# Supplementary material
Source: PubMed Central journal article supplement (PMC5567877)
Supplement: Supp_Figure2.pdf [file Supp_Figure2.pdf]

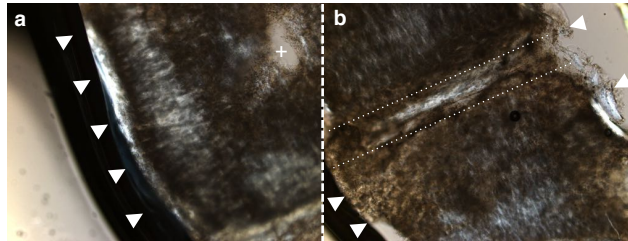

**Supplemental Fig. 2:** Polarized light microscopy images of agarose **a** free swelling and **b** cage construct growth from after 112 days of culture. Collagen alignment was present in the free swelling constructs, likely due to the high tissue swelling. Arrows point along construct periphery, + is interior void, dotted lines surround a channel.
