# Supplementary material
Source: PubMed Central journal article supplement (PMC5567877)
Supplement: Supp_Figure3.pdf [file Supp_Figure3.pdf]

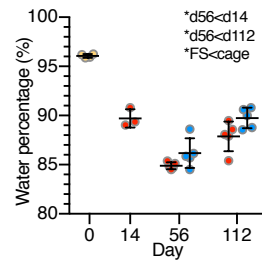

**Supplemental Figure 3:** Study 1 construct water fraction. \* denotes significant ( $p < 0.05$ ) differences between factor levels. X-axis spacing is not temporally representative.
