# Supplementary material
Source: PubMed Central journal article supplement (PMC5567877)
Supplement: Supp_Table1.pdf [file Supp_Table1.pdf]

|                   | Measure           | Day            | Group | Interaction |
|-------------------|-------------------|----------------|-------|-------------|
| Study 1           | E <sub>y</sub>    | *              | ***   | *           |
|                   | G*                | *              | ***   | NS          |
|                   | GAG               | ***            | **    | NS          |
|                   | Coll              | ***            | NS    | NS          |
|                   | GAG-Day0          | ***            | ***   | ***         |
|                   | Coll-Day0         | ***            | ***   | ***         |
|                   | Cell density      | ***            | ***   | ***         |
|                   | Cell density-Day0 | ***            | ***   | ***         |
|                   | PYD               | ***            | ***   | NS          |
|                   | PYD/Coll          | ***            | ***   | NS          |
|                   | Coll Solubility   | ***            | *     | NS          |
|                   | Wet weight        | ***            | **    | NS          |
|                   | SR                | ***            | ***   | ***         |
|                   | Study 2           | E <sub>y</sub> | ***   | **          |
| G*                |                   | ***            | NS    | NS          |
| GAG               |                   | **             | NS    | NS          |
| Coll              |                   | ***            | ***   | NS          |
| GAG-Day0          |                   | ***            | ***   | ***         |
| Coll-Day0         |                   | ***            | ***   | ***         |
| Cell density      |                   | ***            | ***   | ***         |
| Cell density-Day0 |                   | NS             | ***   | NS          |
| SR                |                   | ***            | ***   | ***         |

**Supplemental Table 1:** ANOVA factor significance table. NS: not significant. \*: p<0.05. \*\*: p<0.01. \*\*\*: p<0.001.
